# Supplementary material for: Whole Exome Sequencing Uncovers Genetic Syndromes Associated with Orofacial Clefts presenting with Limb abnormalities in a Sub-Saharan African cohort
Source: Research Square preprint supplement (doi:10.21203/rs.3.rs-8340088/v1), 2025-12-15
Supplement: Supplementary file 2 [file 4ba32cb077e3b028c5f49942.docx]

| **Tools** | **Range** | **Predictive threshold** |
| --- | --- | --- |
| ClinPred | 0-1 | >0.5 |
| MetaRNN | 0-1 | >0.5 |
| BayesDel_addAF | -1.11707-0.750927 | >0.0692655 |
| REVEL | 0-1 | >0.5 |
| CADD | 0-50+ | >20 |
| AlphaMissense | 0-1 | ≥0.564 |
| MutPred | 0-1 | >0.5 |
| PolyPhen2 | 0-1 | >0.5 |
| MutationAssessor | -5.17-6.49 | ≥1.935 |
| MutationTaster rank score | 0.08979-0.81001 | >0.31733 |
| SIFT | 0-1 | <0.05 |
| SpliceAI (splice site variants) | 0-1 | ≥0.20 |
