# Supplementary material for: Whole Exome Sequencing Uncovers Genetic Syndromes Associated with Orofacial Clefts presenting with Limb abnormalities in a Sub-Saharan African cohort
Source: Research Square preprint supplement (doi:10.21203/rs.3.rs-8340088/v1), 2025-12-15
Supplement: Supplementary file 3 [file 5bdfb6d642f9600cca506a85.docx]

| **Family** | ***Gene*** | **Consequence** | **SIFT** | **Polyphen** | **MutationTaster** | **MutationAssessor** | **MetaRNN** | **REVEL** | **MutPred** | **BayesDel_addAF** | **ClinPred** | | **CADD** | **ClinVar** | **AlphaMissense** |
| --- | --- | --- | --- | --- | --- | --- | --- | --- | --- | --- | --- | --- | --- | --- | --- |
| **1** | *RGPD5* | missense | 0.006 | 1 | 0.25445 | N/A | 0.6124567 | 0.208 | 0.314 | -0.154077 | | 0.935625 | 24.3 | N/A | 0.6863 |
|  | *FAM90A26* | frameshift | N/A | N/A | N/A | N/A | N/A | N/A | N/A | N/A | | N/A | N/A | N/A | N/A |
| **2** | *FOXD4L1* | missense | 0.018 | 0.167 | 0.58761 | 3.755 | 0.6520842 | 0.699 | N/A | 0.247689 | | 0.950672 | 25 | N/A | 0.8294 |
|  | *FAM170A* | missense | 0.004 | 0.893 | 0.24494 | 2.955 | 0.6358866 | 0.179 | N/A | -0.0869983 | | 0.922279 | 22.6 | N/A | 0.8505 |
|  | *DLG1* | missense | 0.055 | 0.999 | 0.81001 | 2.305 | 0.2995245 | 0.169 | 0.384 | -0.230176 | | 0.853827 | 28.7 | N/A | 0.7175 |
|  | *ANKRD1* | missense | 0 | 1 | 0.81001 | 1.94 | 0.9093296 | 0.758 | 0.763 | 0.172208 | | 0.996013 | 33 | uncertain significance | 0.9186 |
| **3** | *TP63* | missense | 0 | 1 | 0.81001 | 2.89 | 0.9893642 | 0.918 | 0.927 | 0.517518 | | 0.962532 | 25.9 | Pathogenic | 0.9998 |
| **4** | *NIPBL* | frameshift | N/A | N/A | N/A | N/A | N/A | N/A | N/A | N/A | | N/A | N/A | N/A | N/A |
| **5** | *MYH3* | missense | 0 | 1 | 0.54805 | 3.82 | 0.9917237 | N/A | 0.977 | 0.45848 | | 0.999131 | 33 | Pathogenic | 0.9864 |
| **6** | *FGFR2* | missense | 0 | 0.999 | 0.81001 | 3.43 | 0.9645513 | 0.796 | 0.884 | 0.323451 | | 0.97903 | 33 | Pathogenic | 0.9785 |
| **7** | *TRIM74* | stop gained | N/A | N/A | 0.58761 | N/A | N/A | N/A | N/A | 0.539151 | | N/A | 35 | N/A | N/A |
|  | *TRIM73* | stop gained | N/A | N/A | 0.58761 | N/A | N/A | N/A | N/A | 0.55994 | | N/A | 35 | N/A | N/A |
| **8** | *PRDM9* | frameshift | N/A | N/A | N/A | N/A | N/A | N/A | N/A | N/A | | N/A | N/A | N/A | N/A |
| **9** | *TP63* | missense | 0 | 1 | 0.81001 | 2.935 | 0.9886161 | 0.944 | 0.964 | 0.532837 | | 0.996408 | 29.7 | Pathogenic | 1 |
