# Supplementary material for: Whole Exome Sequencing Uncovers Genetic Syndromes Associated with Orofacial Clefts presenting with Limb abnormalities in a Sub-Saharan African cohort
Source: Research Square preprint supplement (doi:10.21203/rs.3.rs-8340088/v1), 2025-12-15
Supplement: Supplementary file 7 [file bef3ed16ea8d856138854fd0.docx]

| **Family id** | **Gene** | **Genomic coordinate** | **Ref** | **Alt** | **Genotype** | **Primer sequence** | | **Start** | **Len** | **Tm** | **GC%** | **Any_th** | **3'th** | **Hairpin** | **Product size** |
| --- | --- | --- | --- | --- | --- | --- | --- | --- | --- | --- | --- | --- | --- | --- | --- |
| **5 F(XX)** | *MYH3* | chr17:10641317 (rs121913617) | C | T | C/T | Forward | CGTACATCTCATCCCCAAGC | 225 | 20 | 58.13 | 55 | 0 | 0 | 0 | 370 |
| Reverse | ACAGTAGGATGGCAAATGTCA | 594 | 21 | 57.28 | 42.86 | 0 | 0 | 0 |
| **4**  **F(XX)** | *NIPBL* | chr5:37059093 (Novel) | ATG | A | ATG/A | Forward | TGAAGGAGTGGTTGTAGGGG | 81 | 20 | 58.64 | 55 | 0 | 0 | 0 | 500 |
| Reverse | ACCTTACCTATCAGAAAATCCACA | 580 | 24 | 57.36 | 37.5 | 0 | 0 | 0 |
