# Supplementary figures and images for: Whole Exome Sequencing Uncovers Genetic Syndromes Associated with Orofacial Clefts presenting with Limb abnormalities in a Sub-Saharan African cohort
Source: Research Square preprint supplement (doi:10.21203/rs.3.rs-8340088/v1), 2025-12-15

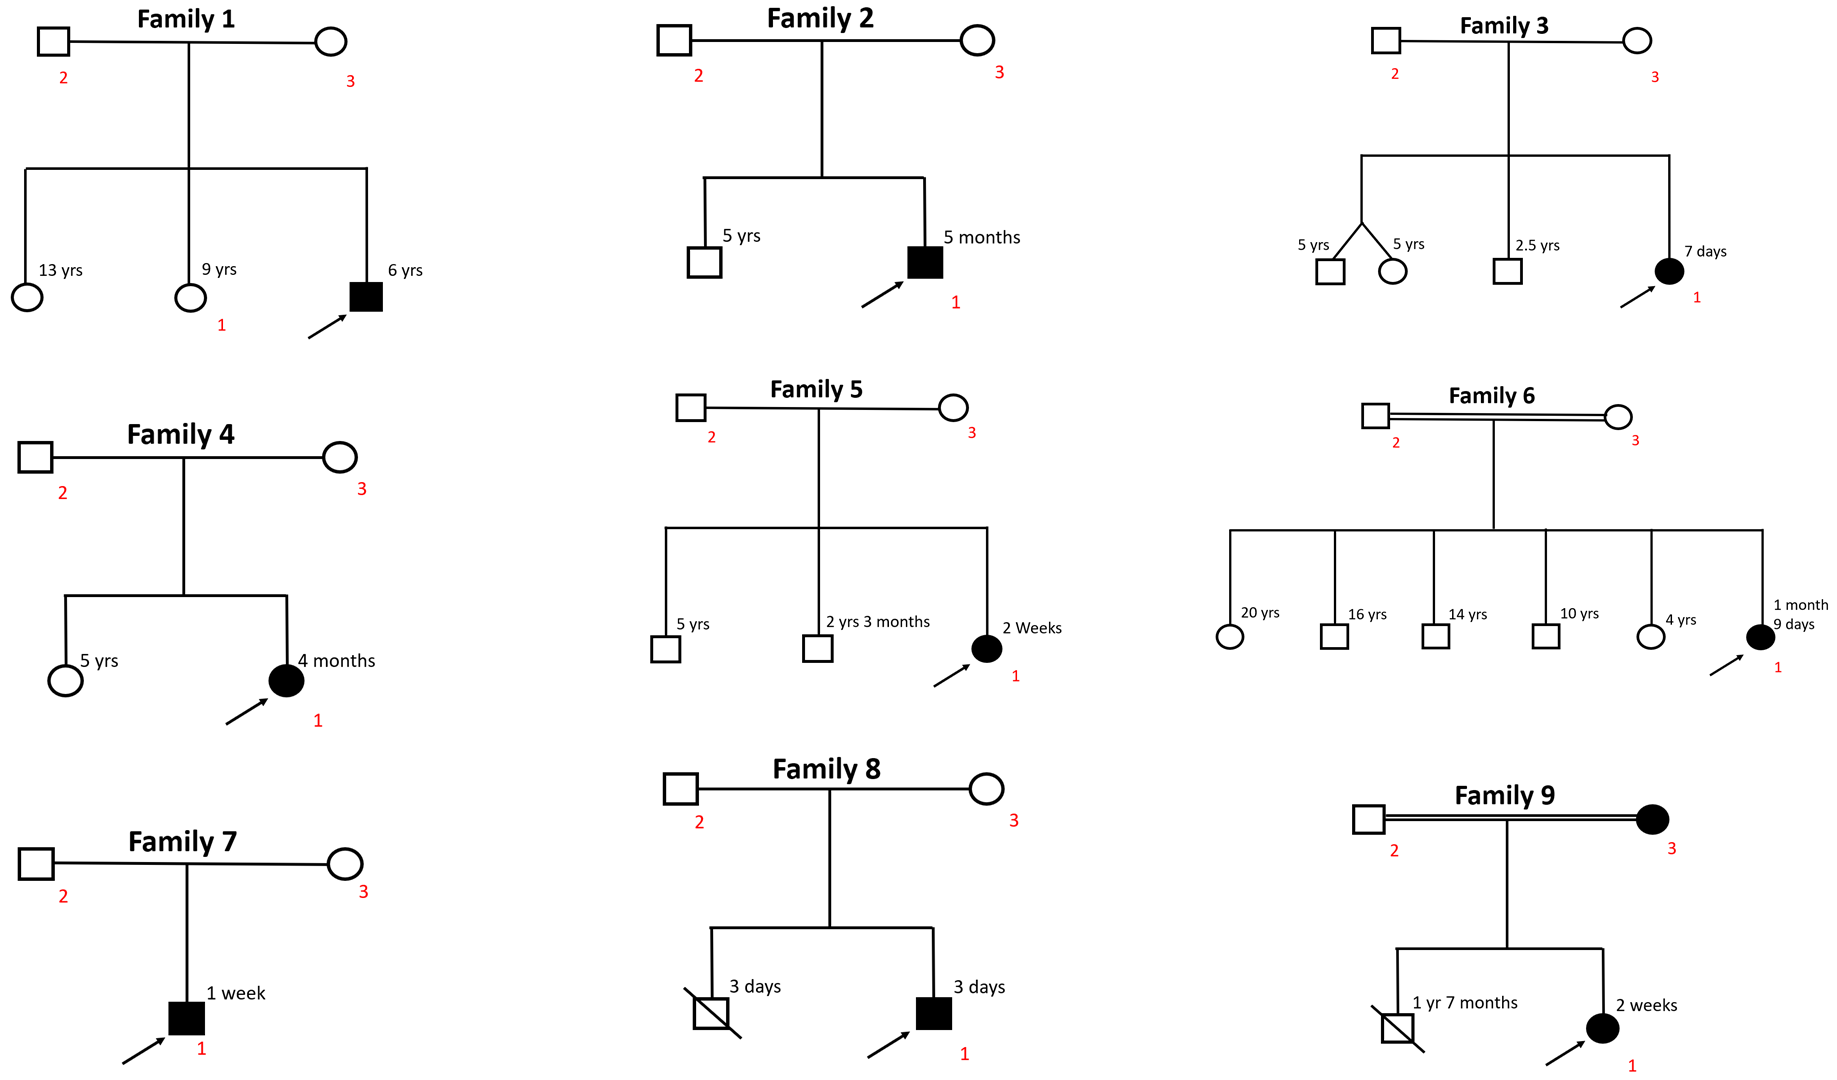


**I**

**F**

**C**

**E**

**H**

**A**

**G**

**B**

**D**

Supplement: Supplementary file 1 [file 1e39c85b75e65e67404d964d.docx]

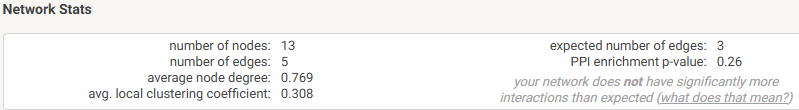

Supplement: Supplementary file 4 [file 818a94f2d1ed48538b5a5563.docx]

**
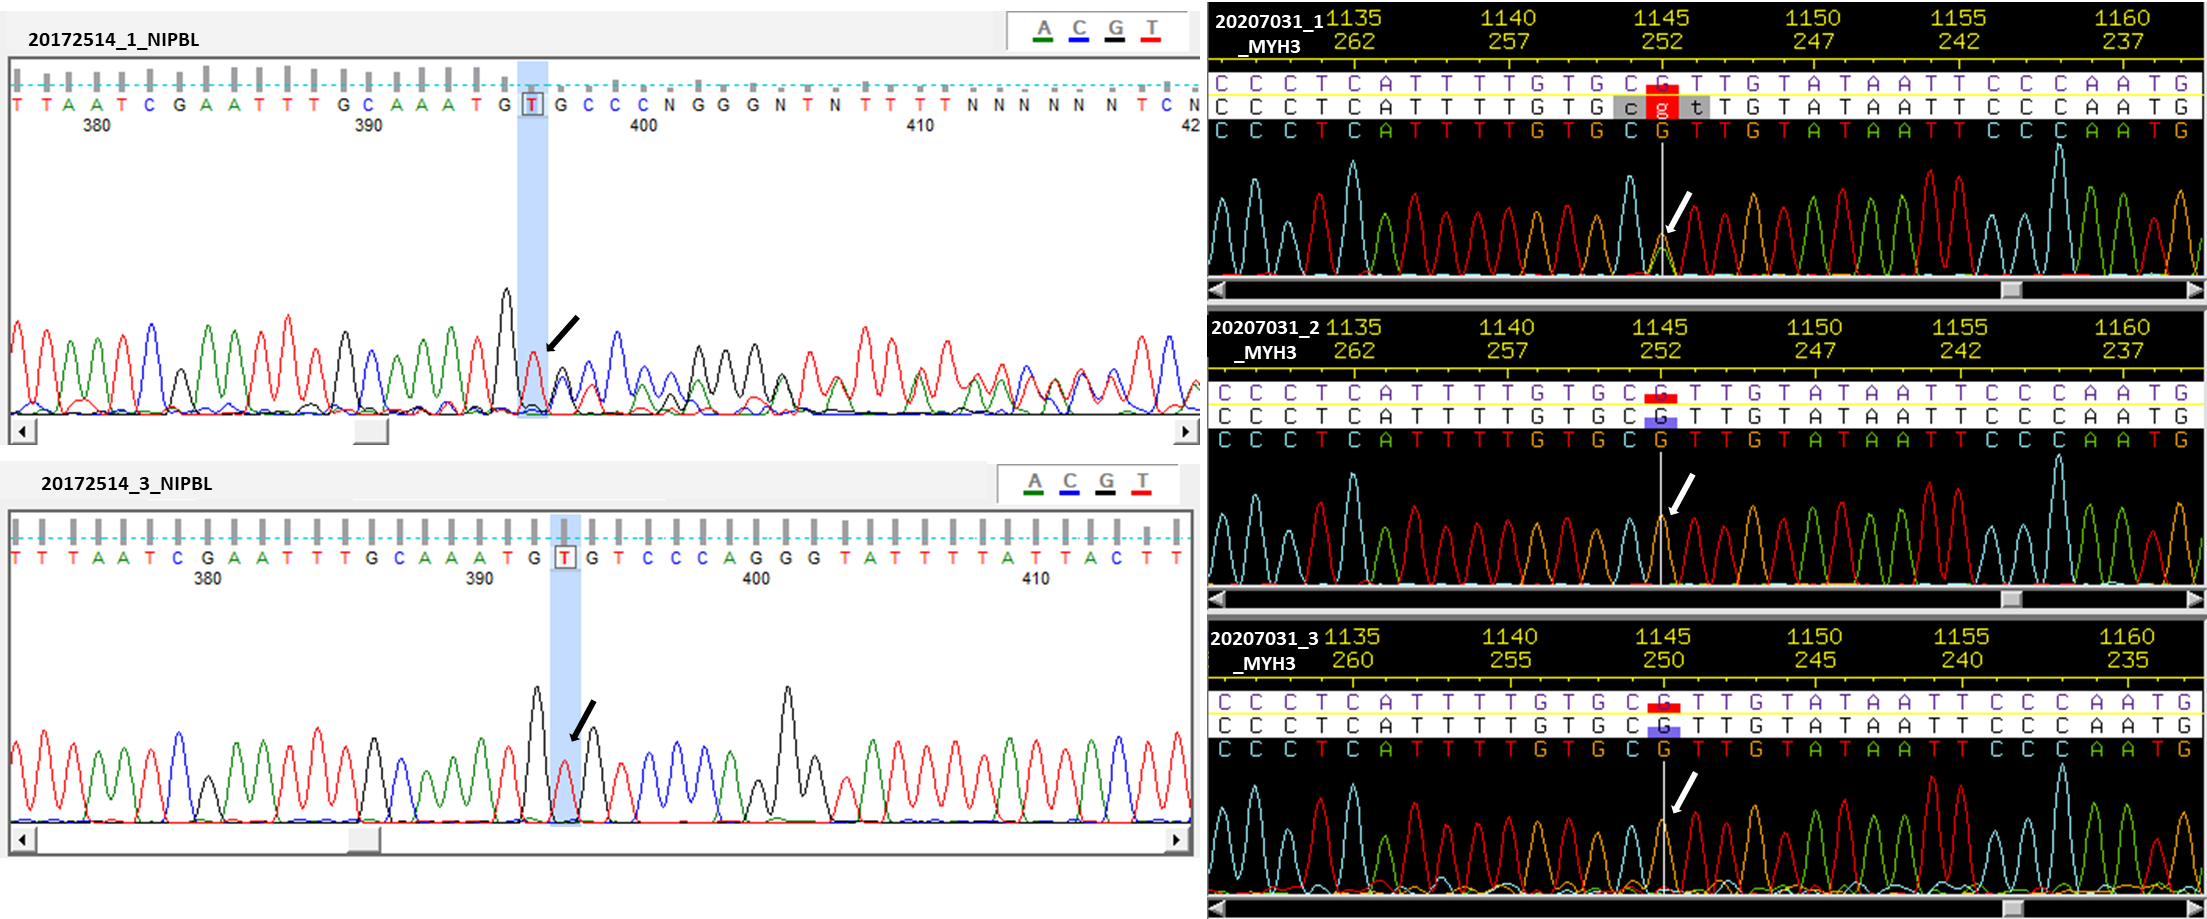
**

Supplement: Supplementary file 5 [file 8cbde9d6d3b2f89dd42f91b9.docx]

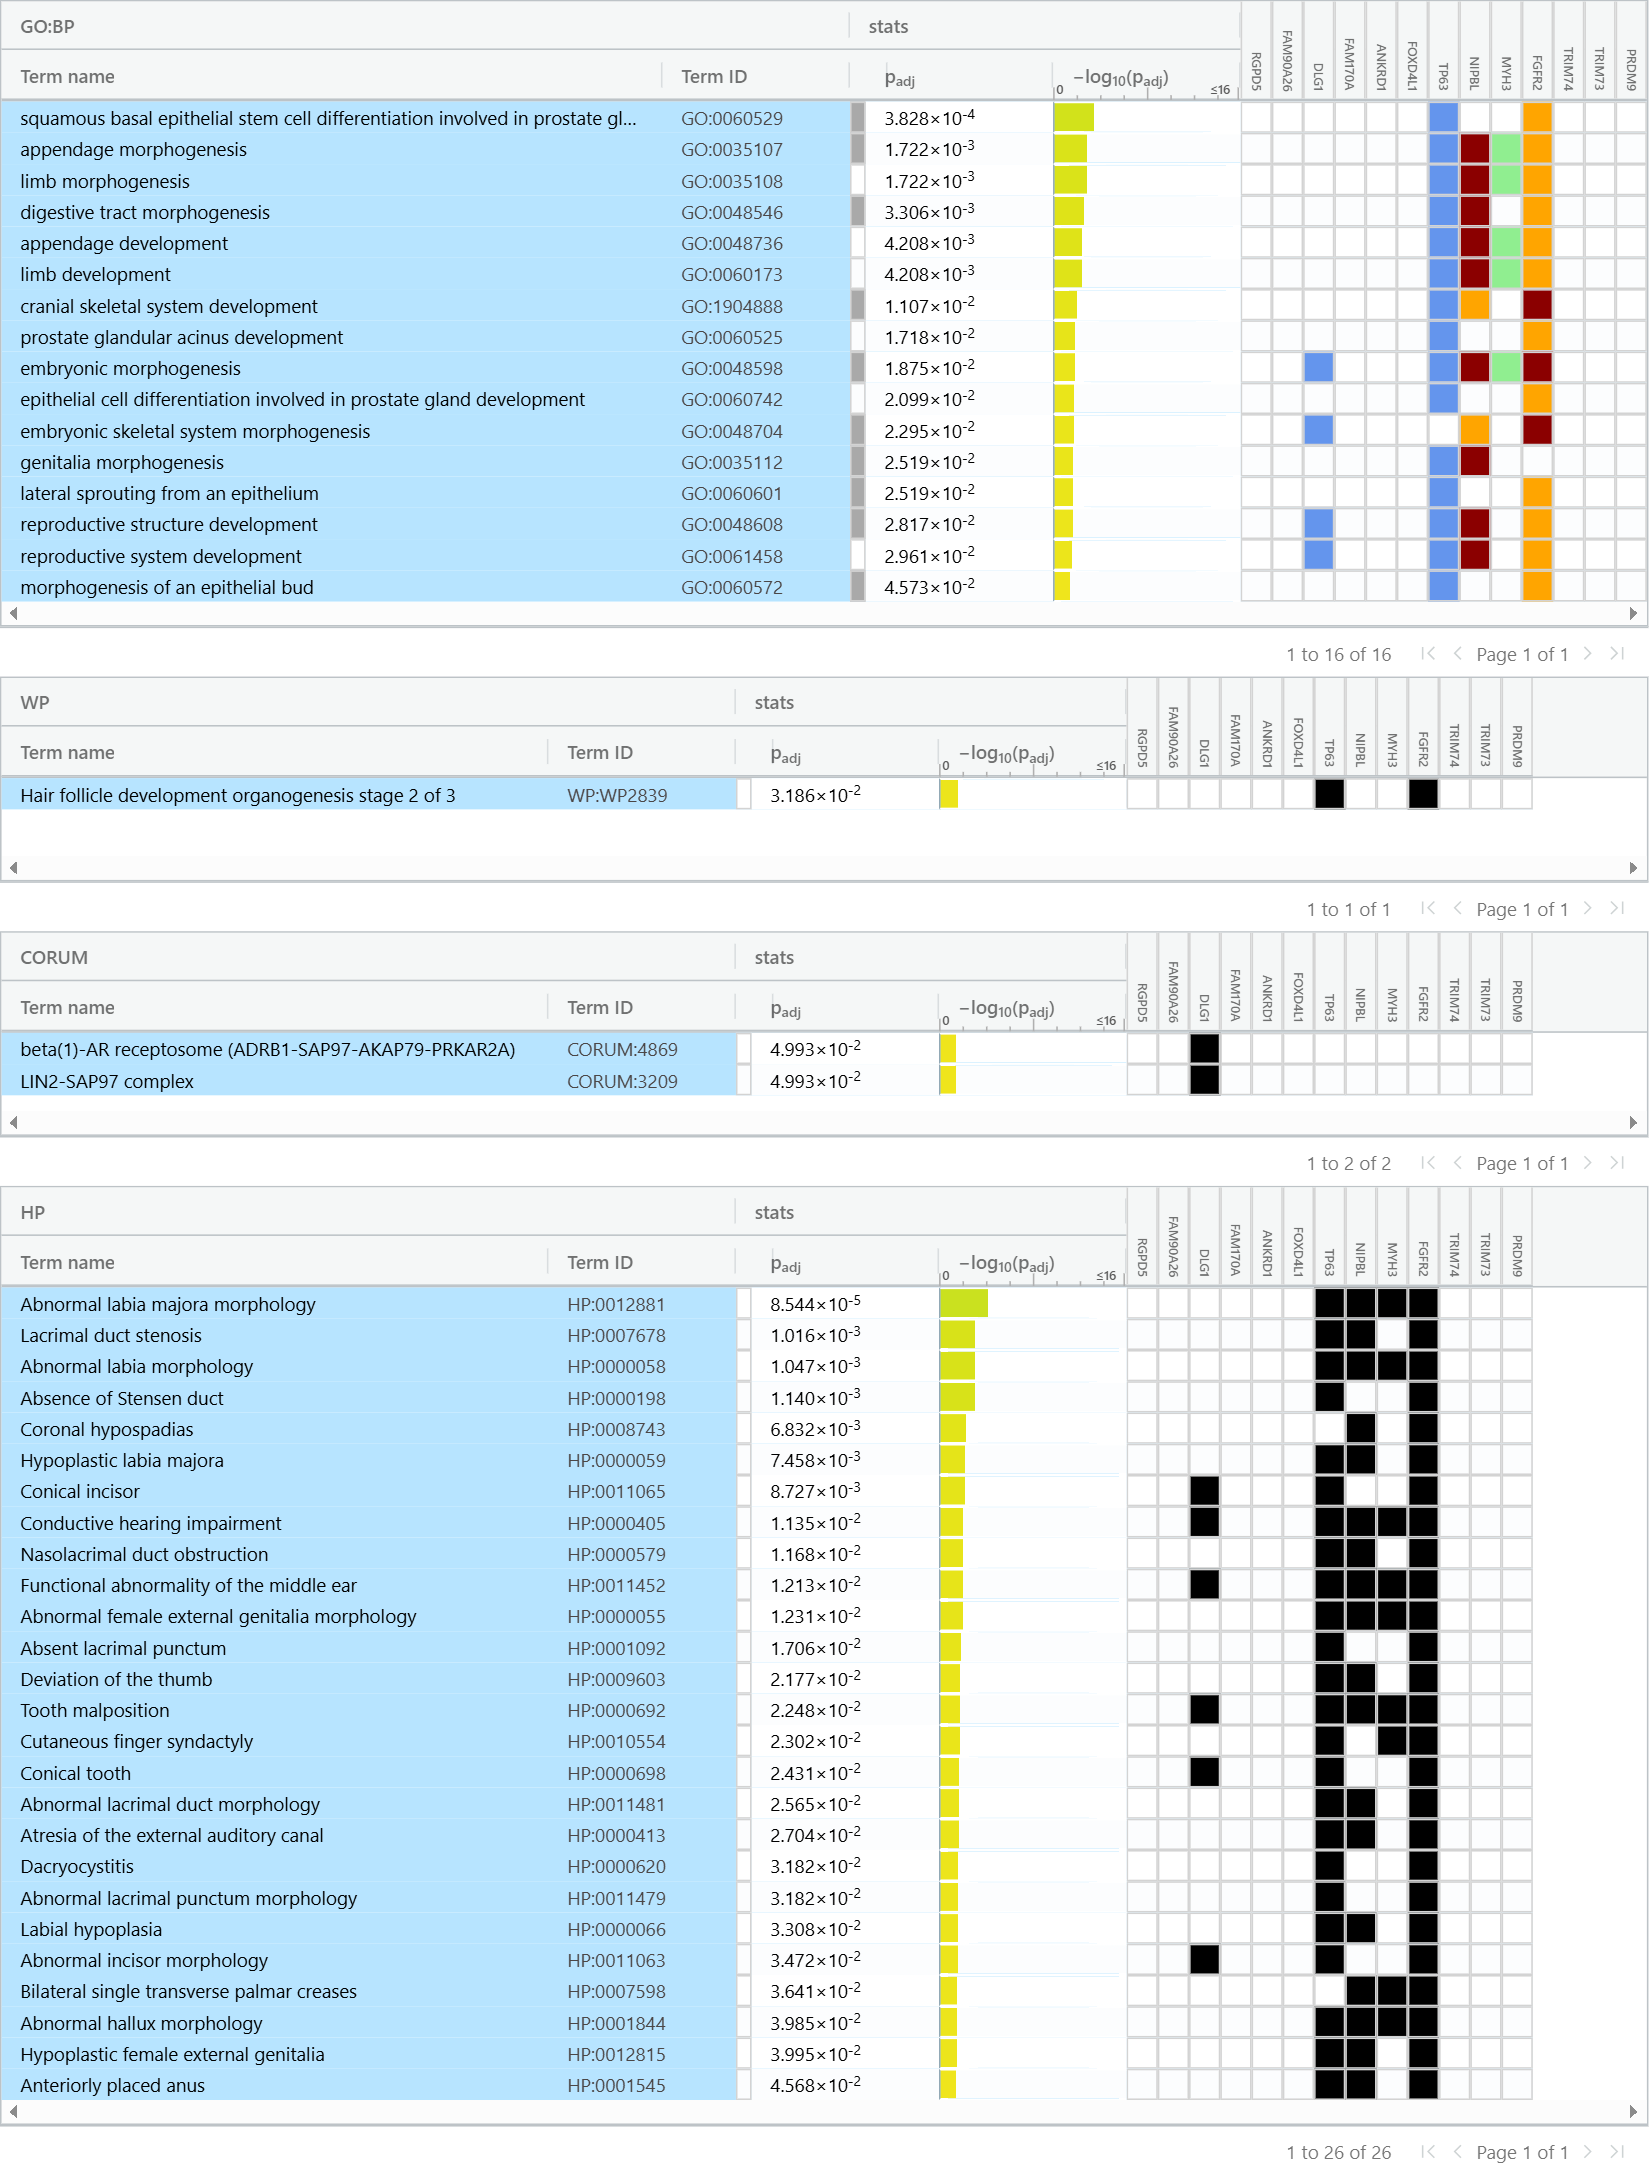

Supplement: Supplementary file 6 [file 9cdc8242828d3f051e97bfca.docx]

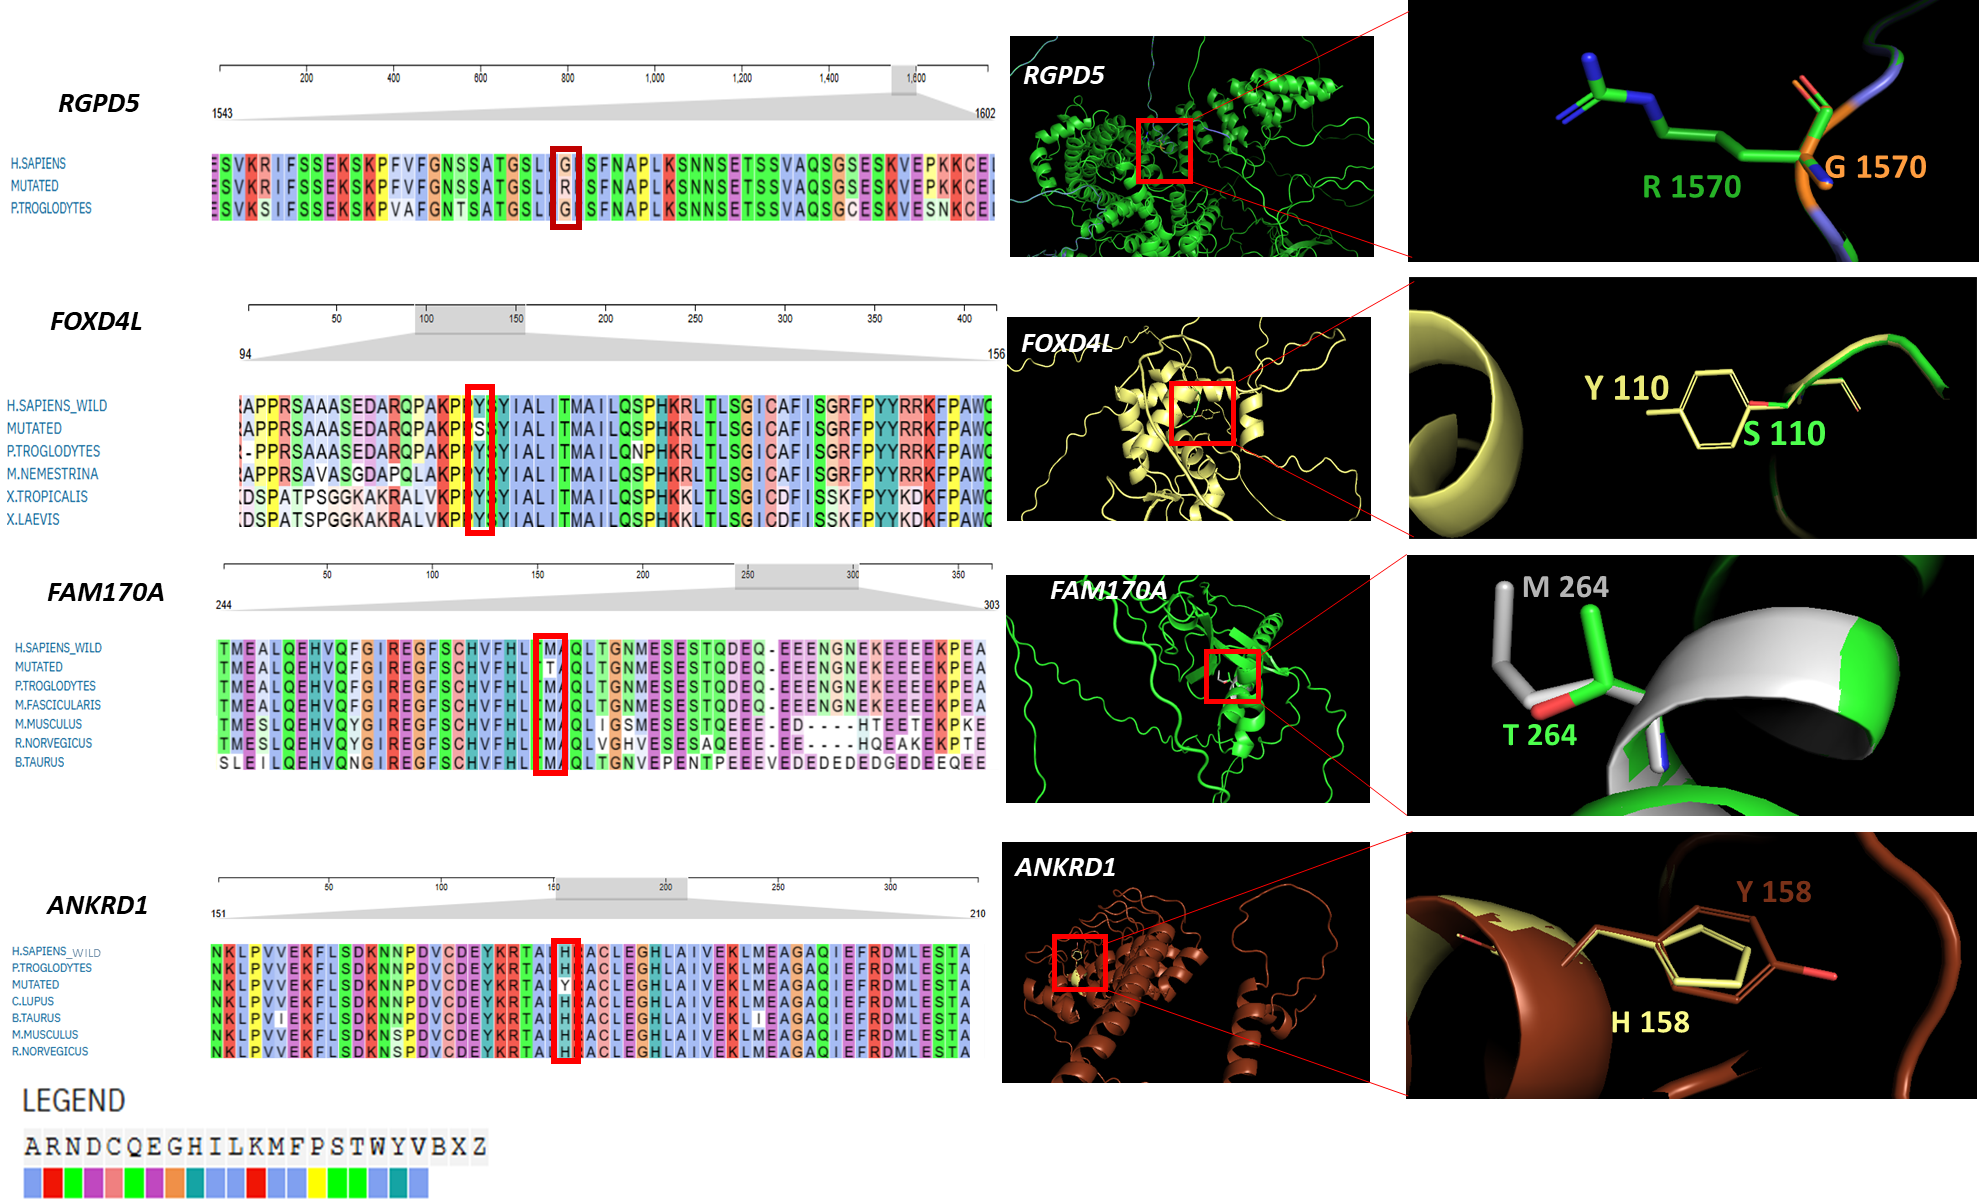

Supplement: Supplementary file 8 [file c846151fe2d9533ab4456ac8.docx]
